# Supplementary material for: An integrated technology for quantitative wide mutational scanning of human antibody Fab libraries
Source: PubMed Central journal article supplement (PMC11087541; doi:10.1038/s41467-024-48072-z), 2024-05-10
Supplement: 41467_2024_48072_MOESM2_ESM.pdf [file 41467_2024_48072_MOESM2_ESM.pdf]

## Description of Additional Supplementary Files

**Supplementary Data 1** A complete list of plasmids, libraries, gene blocks, and primers

**Supplementary Data 2** 4A8 titration data

**Supplementary Data 3** LASSO regression for all variants

**Supplementary Data 4** Processed antibody sequence-binding datasets
